# Supplementary material for: The Origin and Evolutionary History of HIV-1 Subtype C in Senegal
Source: PubMed Central journal article supplement (PMC3314668; doi:10.1371/journal.pone.0033579), 2012-03-28
Supplement: pone.0033579.s006.pdf [file pone.0033579.s006.pdf]

**Table S2 : Details of the strains included in the restricted phylogenetic tree analysis from Figure 2, S2 and S3.**

| <b>STRAIN IDENTIFICATION</b> | <b>ACCESSION NUMBER</b> | <b>COUNTRY CODE</b> | <b>COUNTRY</b>               | <b>DATE</b> |
|------------------------------|-------------------------|---------------------|------------------------------|-------------|
| 1182_48_1229_20030428        | DQ877762                | BE                  | Belgium                      | 2003        |
| 298224175310447              | EU248333                | BE                  | Belgium                      | 2003        |
| 728064148815993              | EU248453                | BE                  | Belgium                      | 2003        |
| 857544175285033              | EU248493                | BE                  | Belgium                      | 2003        |
| B1104                        | AM260271                | BI                  | Burundi                      | 2002        |
| U1305                        | AM260307                | BI                  | Burundi                      | 2002        |
| 393212                       | AF443083                | BW                  | Botswana                     | 1999        |
| 07621                        | AF443088                | BW                  | Botswana                     | 2000        |
| 18802                        | AF443100                | BW                  | Botswana                     | 2000        |
| 2127214                      | AF443105                | BW                  | Botswana                     | 2000        |
| 2210_N                       | AY829309                | BW                  | Botswana                     | 2001        |
| 3920_N                       | AY829326                | BW                  | Botswana                     | 2001        |
| 0067                         | FR666631                | CD                  | Democratic Republic of Congo | 2007        |
| LN082                        | FJ531453                | CN                  | China                        | 2005        |
| 1182_48_4134_20030317        | DQ878365                | DE                  | Germany                      | 2003        |

|                       |          |    |                   |      |
|-----------------------|----------|----|-------------------|------|
| HR1fNvJNtEjG8IV       | GQ400661 | DE | Germany           | 2003 |
| 1182_48_1407_20030410 | DQ877803 | DK | Denmark           | 2003 |
| 1182_48_7101_20030723 | DQ878954 | ES | Spain             | 2003 |
| 1_304517              | EU255374 | ES | Spain             | 2006 |
| PPT42                 | GQ241073 | ES | Spain             | 2002 |
| PPT91                 | GQ241122 | ES | Spain             | 2007 |
| PPT96                 | GQ241127 | ES | Spain             | 2007 |
| H_G_016               | AB285757 | ET | Ethiopia          | 2003 |
| H_G_060               | AB285777 | ET | Ethiopia          | 2003 |
| H_G_090               | AB285792 | ET | Ethiopia          | 2003 |
| H_G_139               | AB285808 | ET | Ethiopia          | 2003 |
| H_G_140               | AB285809 | ET | Ethiopia          | 2003 |
| H_G_238               | AB285833 | ET | Ethiopia          | 2003 |
| H_G_239               | AB285834 | ET | Ethiopia          | 2003 |
| H_G_260               | AB285843 | ET | Ethiopia          | 2003 |
| 288                   | AY713417 | ET | Ethiopia          | 2002 |
| 1182_48_3229_20030523 | DQ878136 | FR | France            | 2003 |
| CIRMF22               | AY140617 | GA | Gabon             | 1997 |
| 404                   | FN557338 | GQ | Equatorial Guinea | 2008 |

|                       |          |    |            |      |
|-----------------------|----------|----|------------|------|
| 1182_48_5096_20030901 | DQ878592 | GR | Greece     | 2003 |
| ET1                   | AY255823 | IL | Israel     | 1999 |
| VL07_103              | EU781835 | IN | India      | 2007 |
| CV1199_92_08          | GU969550 | IT | Italia     | 2008 |
| R2010                 | AF457054 | KE | Kenya      | 2000 |
| 864766187916044       | GQ400273 | LU | Luxenburg  | 2003 |
| PG1                   | AM071423 | MZ | Mozambique | 2003 |
| PG17                  | AM071439 | MZ | Mozambique | 2003 |
| PG232                 | AM071443 | MZ | Mozambique | 2003 |
| MC060                 | GU199551 | MZ | Mozambique | 2002 |
| MT001229              | GU199564 | MZ | Mozambique | 2003 |
| 692158511671732       | GQ399970 | NO | Norway     | 2004 |
| 844174932638419       | GQ400237 | NO | Norway     | 2003 |
| 154002729705766       | GQ399069 | PT | Portugal   | 2003 |
| CBR_138               | HM102337 | PT | Portugal   | 2008 |
| SU504                 | AY102486 | SD | Sudan      | 1998 |
| SU254                 | AY102506 | SD | Sudan      | 1999 |
| 20200                 | AY165187 | SE | Sweden     | 2000 |
| 18813                 | AY165226 | SE | Sweden     | 2000 |

|                  |          |    |         |      |
|------------------|----------|----|---------|------|
| 21063            | AY165252 | SE | Sweden  | 2001 |
| 21064            | AY165253 | SE | Sweden  | 2001 |
| h2C1Zlql7B5bbW0  | GQ400651 | SE | Sweden  | 2004 |
| pfvo5PpoMpzcBvi  | GQ400816 | SE | Sweden  | 2003 |
| 2426_34722       | GU324870 | SE | Sweden  | 2006 |
| 39HALD           | AJ287005 | SN | Senegal | 1998 |
| 142HPD_21_4_99   | AJ583715 | SN | Senegal | 1999 |
| 159HALD_14_10_99 | AJ583716 | SN | Senegal | 1999 |
| 66HPD_31_7_98    | AJ583722 | SN | Senegal | 1998 |
| 86hpd_9_2_99     | AJ583739 | SN | Senegal | 1999 |
| SE_364           | AY713416 | SN | Senegal | 1990 |
| MS002            | FM210684 | SN | Senegal | 2004 |
| MS007            | FM210685 | SN | Senegal | 2004 |
| MS010            | FM210686 | SN | Senegal | 2004 |
| MS011            | FM210687 | SN | Senegal | 2004 |
| MS015            | FM210689 | SN | Senegal | 2004 |
| MS029            | FM210691 | SN | Senegal | 2004 |
| MS245            | FM210699 | SN | Senegal | 2004 |
| MS422            | FM210709 | SN | Senegal | 2004 |

|         |          |    |         |      |
|---------|----------|----|---------|------|
| MS448   | FM210712 | SN | Senegal | 2004 |
| MS475   | FM210716 | SN | Senegal | 2004 |
| MS477   | FM210717 | SN | Senegal | 2004 |
| MS481   | FM210718 | SN | Senegal | 2004 |
| MS487   | FM210722 | SN | Senegal | 2004 |
| MS492   | FM210723 | SN | Senegal | 2004 |
| MS522   | FM210725 | SN | Senegal | 2004 |
| MS540   | FM210726 | SN | Senegal | 2004 |
| MS700   | FM210736 | SN | Senegal | 2004 |
| MS779   | FM210737 | SN | Senegal | 2004 |
| MS816   | FM210740 | SN | Senegal | 2004 |
| MS821   | FM210741 | SN | Senegal | 2004 |
| MS835   | FM210745 | SN | Senegal | 2004 |
| MS855   | FM210749 | SN | Senegal | 2004 |
| MS883   | FM210752 | SN | Senegal | 2004 |
| MS34    | FM210753 | SN | Senegal | 2004 |
| 67HPD   | FN599718 | SN | Senegal | 1999 |
| 510HALD | FN599737 | SN | Senegal | 2002 |
| 965hald | FN599773 | SN | Senegal | 2003 |

|          |          |    |         |      |
|----------|----------|----|---------|------|
| 980hald  | FN599776 | SN | Senegal | 2003 |
| L065     | HE588149 | SN | Senegal | 2003 |
| 2658HALD | HE588150 | SN | Senegal | 2007 |
| 2909HALD | HE588151 | SN | Senegal | 2007 |
| 2911HALD | HE588152 | SN | Senegal | 2007 |
| 2936HALD | HE588153 | SN | Senegal | 2007 |
| 3076HALD | HE588154 | SN | Senegal | 2007 |
| 463HALD  | HE588155 | SN | Senegal | 2006 |
| 321HALD  | HE588156 | SN | Senegal | 2003 |
| 154HALD  | HE588157 | SN | Senegal | 2003 |
| 260HALD  | HE588158 | SN | Senegal | 2002 |
| 102HALD  | HE588159 | SN | Senegal | 2000 |
| 1189     | HE588160 | SN | Senegal | 1997 |
| 1186     | HE588161 | SN | Senegal | 1997 |
| 1119     | HE588162 | SN | Senegal | 1997 |
| 478HALD  | HE588163 | SN | Senegal | 2002 |
| 25Fann   | HE588164 | SN | Senegal | 1997 |
| 14Fann   | HE588165 | SN | Senegal | 1997 |
| 1083     | HE588166 | SN | Senegal | 1996 |

|          |          |    |              |      |
|----------|----------|----|--------------|------|
| SNA3_107 | HM002507 | SN | Senegal      | 2007 |
| SNA3_191 | HM002515 | SN | Senegal      | 2008 |
| SNA3_220 | HM002517 | SN | Senegal      | 2008 |
| SNA3_366 | HM002544 | SN | Senegal      | 2009 |
| 156      | EU244675 | SZ | Swaziland    | 2002 |
| 17       | EU244681 | SZ | Swaziland    | 2002 |
| 013P01   | AY136966 | ZA | South Africa | 2001 |
| 033P01   | AY136986 | ZA | South Africa | 2001 |
| 036P01   | AY136989 | ZA | South Africa | 2001 |
| 042P01   | AY136995 | ZA | South Africa | 2001 |
| DR16     | AY589877 | ZA | South Africa | 2002 |
| DR18     | AY589879 | ZA | South Africa | 2002 |
| DR28     | AY589885 | ZA | South Africa | 2002 |
| DR29     | AY589886 | ZA | South Africa | 2002 |
| DR52     | AY589905 | ZA | South Africa | 2002 |
| DR60     | AY589912 | ZA | South Africa | 2002 |
| DR64     | AY589914 | ZA | South Africa | 2002 |
| SK144B1  | AY703911 | ZA | South Africa | 2004 |
| SK041B1  | AY772693 | ZA | South Africa | 2003 |

|              |          |    |              |      |
|--------------|----------|----|--------------|------|
| SK011B2      | AY901965 | ZA | South Africa | 2003 |
| SK145B1      | AY901976 | ZA | South Africa | 2004 |
| TV002_patent | BD437626 | ZA | South Africa | 1998 |
| SK161B1      | DQ011170 | ZA | South Africa | 2004 |
| SK156B1      | DQ011171 | ZA | South Africa | 2004 |
| SK132B1      | DQ093594 | ZA | South Africa | 2004 |
| PS216B1      | DQ093600 | ZA | South Africa | 2004 |
| SK247B1      | DQ369994 | ZA | South Africa | 2005 |
| 1795         | EF602230 | ZA | South Africa | 2002 |
| KEH44B       | EU152414 | ZA | South Africa | 2006 |
| CHB398M      | EU152435 | ZA | South Africa | 2006 |
| CHB398B      | EU152436 | ZA | South Africa | 2006 |
| CHB200B      | EU152470 | ZA | South Africa | 2006 |
| 2_2R         | EU854482 | ZA | South Africa | 2007 |
| PS178        | FJ199738 | ZA | South Africa | 2004 |
| PS216        | FJ199771 | ZA | South Africa | 2004 |
| CAP255_8w_F1 | GQ999988 | ZA | South Africa | 2005 |
| CAP257_7w_F1 | GQ999990 | ZA | South Africa | 2005 |
| 15274        | GU253409 | ZA | South Africa | 2006 |



|             |          |    |              |      |
|-------------|----------|----|--------------|------|
| 17071       | GU253410 | ZA | South Africa | 2006 |
| 16923       | GU253416 | ZA | South Africa | 2006 |
| 17568       | GU253418 | ZA | South Africa | 2007 |
| KLesa4      | GQ433822 | ZM | Zambia       | 2005 |
| KZ2         | GQ433840 | ZM | Zambia       | 2005 |
| CP076300055 | HM119645 | ZM | Zambia       | 2008 |
| CP076300113 | HM119690 | ZM | Zambia       | 2008 |
| CP076300129 | HM119705 | ZM | Zambia       | 2008 |
| CP076300132 | HM119708 | ZM | Zambia       | 2008 |
| CP076300136 | HM119712 | ZM | Zambia       | 2008 |
| CP076300156 | HM119731 | ZM | Zambia       | 2008 |
| CP076300164 | HM119739 | ZM | Zambia       | 2008 |
| CP076300171 | HM119744 | ZM | Zambia       | 2008 |
| CP076300196 | HM119767 | ZM | Zambia       | 2008 |
| CP076300201 | HM119771 | ZM | Zambia       | 2008 |
| CP076300219 | HM119787 | ZM | Zambia       | 2008 |
| CP076300449 | HM119870 | ZM | Zambia       | 2008 |
| CP076300471 | HM119891 | ZM | Zambia       | 2008 |
| CP076300537 | HM119952 | ZM | Zambia       | 2008 |

|             |          |    |          |      |
|-------------|----------|----|----------|------|
| CP076300552 | HM119962 | ZM | Zambia   | 2008 |
| CP076300598 | HM119999 | ZM | Zambia   | 2008 |
| CP076300652 | HM120046 | ZM | Zambia   | 2008 |
| CP076300654 | HM120047 | ZM | Zambia   | 2008 |
| CP076300667 | HM120058 | ZM | Zambia   | 2008 |
| CP076300696 | HM120081 | ZM | Zambia   | 2008 |
| CP076302410 | HM120110 | ZM | Zambia   | 2008 |
| CP076302487 | HM120141 | ZM | Zambia   | 2008 |
| CP076302494 | HM120142 | ZM | Zambia   | 2008 |
| TC02_2003   | FJ445715 | ZW | Zimbabwe | 2003 |
