# Supplementary material for: The Origin and Evolutionary History of HIV-1 Subtype C in Senegal
Source: PubMed Central journal article supplement (PMC3314668; doi:10.1371/journal.pone.0033579), 2012-03-28
Supplement: pone.0033579.s007.pdf [file pone.0033579.s007.pdf]

**Table S3. Dating the subtype C epidemic in general and MSM populations in Senegal.** Coalescent based estimations (BEAST) and 95% highest posterior density (HPD) intervals of the MRCA dates and substitution rates of 56 HIV-1 subtype C *pol* sequences obtained from the general and the MSM population. Results are displayed for all tested substitution rate priors and molecular clock models.

| Prior                                          | Molecular clock                               | Alignment  | Marginal likelihood | Bayes Factor (vs. Lognormal) | Substitution rate     |                       |                       | tMRCA                 |        |       | tMRCA(MSM) |        |       |      |
|------------------------------------------------|-----------------------------------------------|------------|---------------------|------------------------------|-----------------------|-----------------------|-----------------------|-----------------------|--------|-------|------------|--------|-------|------|
|                                                |                                               |            |                     |                              | Mean                  | 95%HPD                |                       | Mean                  | 95%HPD |       | Mean       | 95%HPD |       |      |
|                                                |                                               |            |                     |                              |                       | Lower                 | Upper                 |                       | Lower  | Upper |            | Lower  | Upper |      |
| U[0,1]                                         | Strict                                        | complete   | -6669.19            | -6.30                        | 1.59x10 <sup>-3</sup> | 1.02x10 <sup>-3</sup> | 2.19x10 <sup>-3</sup> | 1966                  | 1952   | 1978  | 1981       | 1971   | 1989  |      |
|                                                |                                               | restricted | -5896.28            | -6.61                        | 1.63x10 <sup>-3</sup> | 1.06x10 <sup>-3</sup> | 2.37x10 <sup>-3</sup> | 1966                  | 1950   | 1979  | 1981       | 1971   | 1989  |      |
|                                                | Exponential                                   | complete   | -6647.07            | 3.31                         | 1.76x10 <sup>-3</sup> | 5.04x10 <sup>-6</sup> | 3.47x10 <sup>-3</sup> | 1859                  | 1683   | 1987  | 1880       | 1716   | 1992  |      |
|                                                |                                               | restricted | -5881.06            | 5.08                         | 1.81x10 <sup>-3</sup> | 1.31x10 <sup>-6</sup> | 3.84x10 <sup>-3</sup> | 1833                  | 1596   | 1989  | 1856       | 1646   | 1993  |      |
|                                                | Lognormal                                     | complete   | -6654.68            | -                            | 1.64x10 <sup>-3</sup> | 8.64x10 <sup>-4</sup> | 2.44x10 <sup>-3</sup> | 1967                  | 1950   | 1983  | 1979       | 1965   | 1989  |      |
|                                                |                                               | restricted | -5892.76            | -                            | 1.68x10 <sup>-3</sup> | 8.67x10 <sup>-4</sup> | 2.48x10 <sup>-3</sup> | 1967                  | 1947   | 1982  | 1980       | 1966   | 1989  |      |
|                                                | N(2.5x10 <sup>-3</sup> ,10x10 <sup>-4</sup> ) | Strict     | complete            | -6667.72                     | -6.10                 | 1.69x10 <sup>-3</sup> | 1.09x10 <sup>-3</sup> | 2.24x10 <sup>-3</sup> | 1968   | 1956  | 1978       | 1982   | 1975  | 1989 |
|                                                |                                               |            | restricted          | -5897.10                     | -2.85                 | 1.72x10 <sup>-3</sup> | 1.17x10 <sup>-3</sup> | 2.39x10 <sup>-3</sup> | 1969   | 1956  | 1980       | 1982   | 1974  | 1989 |
| Exponential                                    |                                               | complete   | -6646.83            | 2.98                         | 2.15x10 <sup>-3</sup> | 7.22x10 <sup>-4</sup> | 3.77x10 <sup>-3</sup> | 1964                  | 1930   | 1987  | 1971       | 1938   | 1990  |      |
|                                                |                                               | restricted | -5880.82            | 4.22                         | 2.23x10 <sup>-3</sup> | 4.77x10 <sup>-4</sup> | 3.65x10 <sup>-3</sup> | 1963                  | 1920   | 1987  | 1971       | 1932   | 1992  |      |
| Lognormal                                      |                                               | complete   | -6653.68            | -                            | 1.77x10 <sup>-3</sup> | 1.04x10 <sup>-3</sup> | 2.46x10 <sup>-3</sup> | 1970                  | 1957   | 1982  | 1981       | 1971   | 1990  |      |
|                                                |                                               | restricted | -5890.53            | -                            | 1.81x10 <sup>-3</sup> | 1.14x10 <sup>-3</sup> | 2.55x10 <sup>-3</sup> | 1970                  | 1956   | 1982  | 1982       | 1972   | 1989  |      |
| N(2.5x10 <sup>-3</sup> ,7.5x10 <sup>-4</sup> ) |                                               | Strict     | complete            | -6669.40                     | -5.92                 | 1.73x10 <sup>-3</sup> | 1.21x10 <sup>-3</sup> | 2.22x10 <sup>-3</sup> | 1969   | 1959  | 1978       | 1983   | 1976  | 1989 |
|                                                |                                               |            | restricted          | -5899.39                     | -3.11                 | 1.80x10 <sup>-3</sup> | 1.25x10 <sup>-3</sup> | 2.35x10 <sup>-3</sup> | 1970   | 1960  | 1979       | 1983   | 1976  | 1989 |
|                                                | Exponential                                   | complete   | -6647.35            | 3.66                         | 2.30x10 <sup>-3</sup> | 1.05x10 <sup>-3</sup> | 3.61x10 <sup>-3</sup> | 1972                  | 1949   | 1986  | 1978       | 1956   | 1991  |      |
|                                                |                                               | restricted | -5883.08            | 3.98                         | 2.39x10 <sup>-3</sup> | 1.15x10 <sup>-3</sup> | 3.76x10 <sup>-3</sup> | 1972                  | 1951   | 1987  | 1978       | 1960   | 1992  |      |
|                                                | Lognormal                                     | complete   | -6655.78            | -                            | 1.81x10 <sup>-3</sup> | 1.20x10 <sup>-3</sup> | 2.51x10 <sup>-3</sup> | 1971                  | 1959   | 1982  | 1982       | 1972   | 1989  |      |
|                                                |                                               | restricted | -5892.23            | -                            | 1.87x10 <sup>-3</sup> | 1.23x10 <sup>-3</sup> | 2.57x10 <sup>-3</sup> | 1972                  | 1960   | 1982  | 1983       | 1974   | 1989  |      |
|                                                | N(2.5x10 <sup>-3</sup> ,5x10 <sup>-4</sup> )  | Strict     | complete            | -6670.93                     | -7.77                 | 1.85x10 <sup>-3</sup> | 1.36x10 <sup>-3</sup> | 2.37x10 <sup>-3</sup> | 1971   | 1962  | 1979       | 1984   | 1978  | 1989 |
|                                                |                                               |            | restricted          | -5899.32                     | -3.33                 | 1.91x10 <sup>-3</sup> | 1.37x10 <sup>-3</sup> | 2.40x10 <sup>-3</sup> | 1972   | 1964  | 1980       | 1984   | 1978  | 1989 |
| Exponential                                    |                                               | complete   | -6645.84            | 3.13                         | 2.38x10 <sup>-3</sup> | 1.50x10 <sup>-3</sup> | 3.31x10 <sup>-3</sup> | 1975                  | 1963   | 1986  | 1981       | 1968   | 1989  |      |
|                                                |                                               | restricted | -5882.72            | 3.88                         | 2.45x10 <sup>-3</sup> | 1.42x10 <sup>-3</sup> | 3.23x10 <sup>-3</sup> | 1975                  | 1962   | 1986  | 1981       | 1969   | 1990  |      |
| Lognormal                                      |                                               | complete   | -6653.05            | -                            | 1.97x10 <sup>-3</sup> | 1.31x10 <sup>-3</sup> | 2.51x10 <sup>-3</sup> | 1974                  | 1964   | 1982  | 1983       | 1976   | 1989  |      |
|                                                |                                               | restricted | -5891.65            | -                            | 2.00x10 <sup>-3</sup> | 1.32x10 <sup>-3</sup> | 2.53x10 <sup>-3</sup> | 1974                  | 1963   | 1981  | 1984       | 1977   | 1989  |      |
